# Supplementary material for: On the mechanisms of lysis triggered by perturbations of bacterial cell wall biosynthesis
Source: PubMed Central journal article supplement (PMC10336097; doi:10.1038/s41467-023-39723-8), 2023-07-11
Supplement: 41467_2023_39723_MOESM1_ESM.pdf [file 41467_2023_39723_MOESM1_ESM.pdf]

**SUPPLEMENTARY INFORMATION for:**

**On the mechanisms of lysis triggered by perturbations of bacterial cell wall biosynthesis**

Yoshikazu Kawai\*, Maki Kawai, Eilidh Sohini Mackenzie, Yousef Dashti, Bernhard Kepplinger, Kevin John Waldron, Jeff Errington\*

\*Corresponding authors

yoshikazu.kawai@sydney.edu.au

jeffery.errington@sydney.edu.au

**Contents:**

Supplementary Figs. 1-7, Supplementary Table 1 and 2 and Supplementary References.

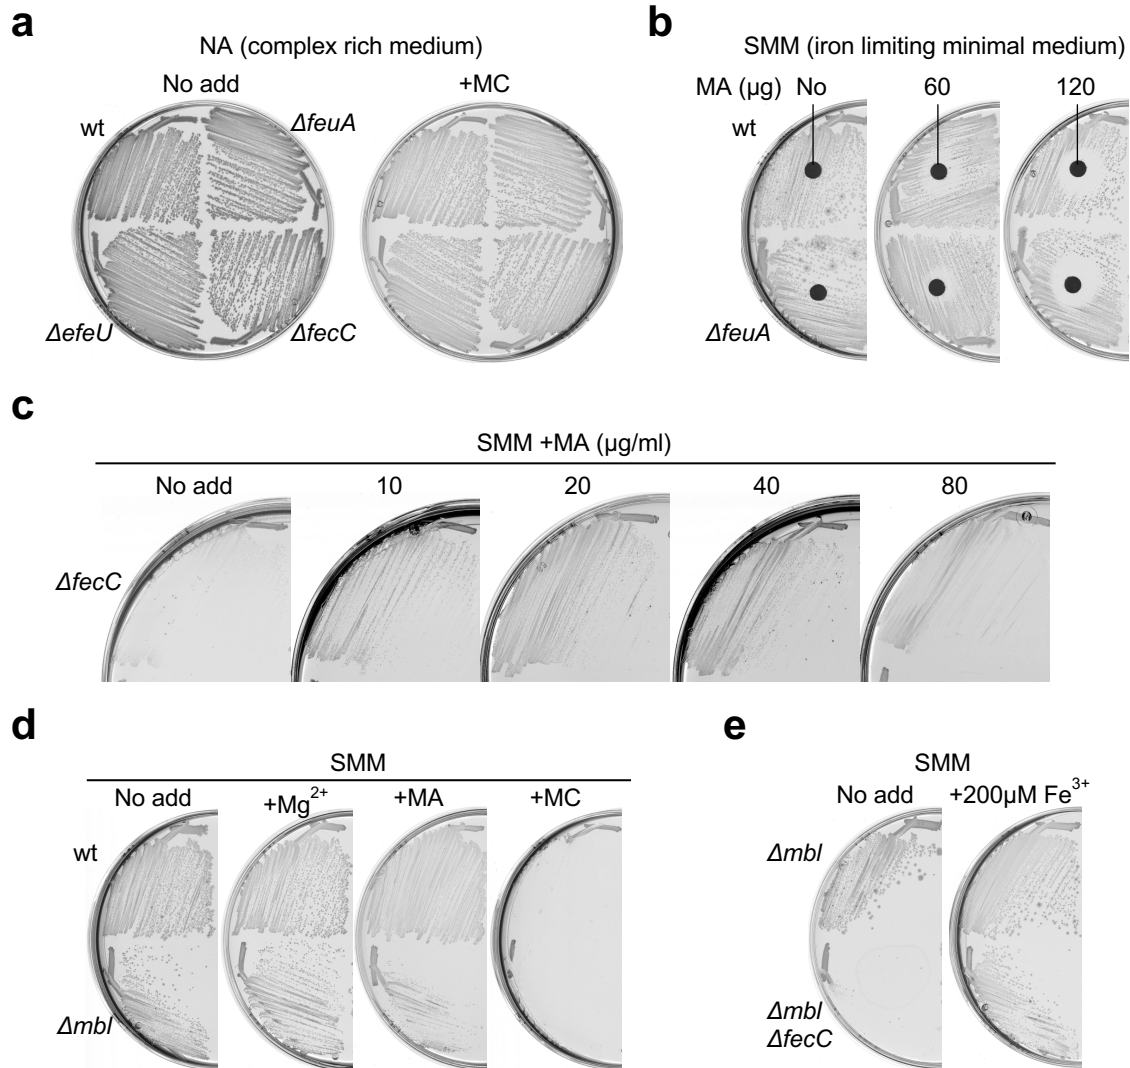

Supplementary Fig. 1. **Effects of Mirubactins and iron availability on *B. subtilis* growth.** **a** Effects of MC on *B. subtilis* growth in a complex medium. *B. subtilis* strains 168CA (wild-type), YK2739 ( $\Delta feU$ ), YK2740 ( $\Delta fecC$ ) and YK2741 ( $\Delta feuA$ ) were streaked on NA plates with or without 10  $\mu\text{g/ml}$  MC, and incubated for 18 hr at 37°C. **b** Growth inhibition by high concentrations of MA in an iron-limiting minimal medium. Wild-type and  $\Delta feuA$  strains were streaked on SMM plates with paper disc containing MA, and incubated for 30-42 hr at 37°C. **c** Growth of *B. subtilis* mediated by an iron utilization with MA.  $\Delta fecC$  mutant were streaked on SMM plates with or without various concentrations of MA, as indicated, and incubated for 30-42 hr at 37°C. **d** Growth of an *mbl* mutant in a minimal medium. Wild-type (168CA) and  $\Delta mbl$  (YK2638) strains were streaked on SMM plates with or without 10 mM  $\text{Mg}^{2+}$ , 10  $\mu\text{g/ml}$  MA or MC, and incubated for 30-42 hr at 37°C. **e** Effects of iron availability on *mbl* mutant growth in a minimal medium. *mbl* mutant strains (YK2638;  $\Delta mbl$ , YK2771;  $\Delta mbl \Delta fecC$ ) were streaked on SMM plates with or without added 200  $\mu\text{M}$  ferric chloride ( $\text{Fe}^{3+}$ ), and incubated for 30-42 hr at 37°C.

The figures are representative of at least three independent experiments.

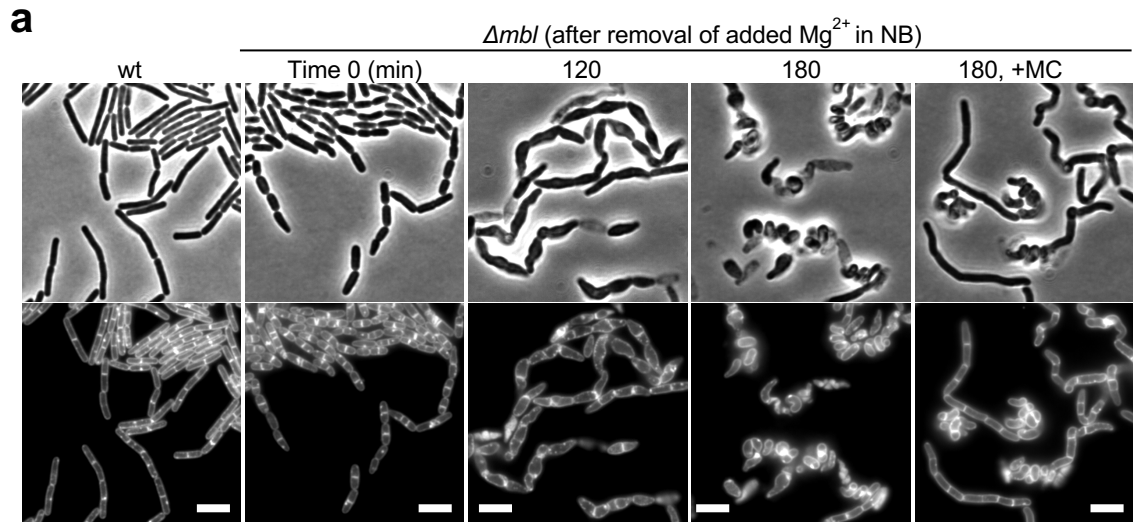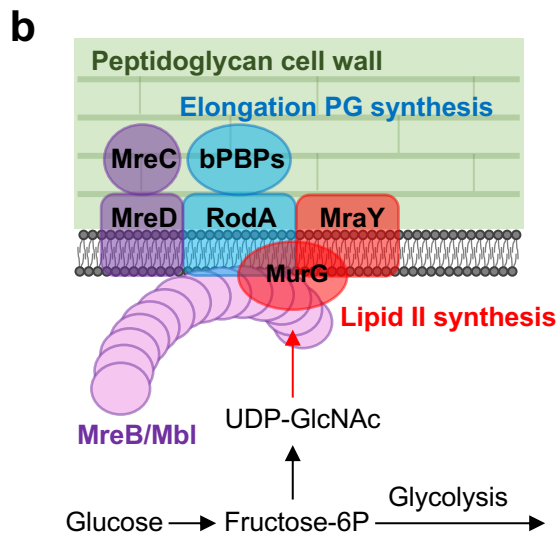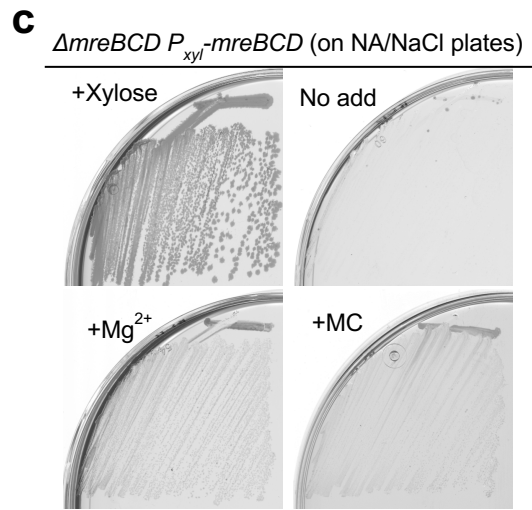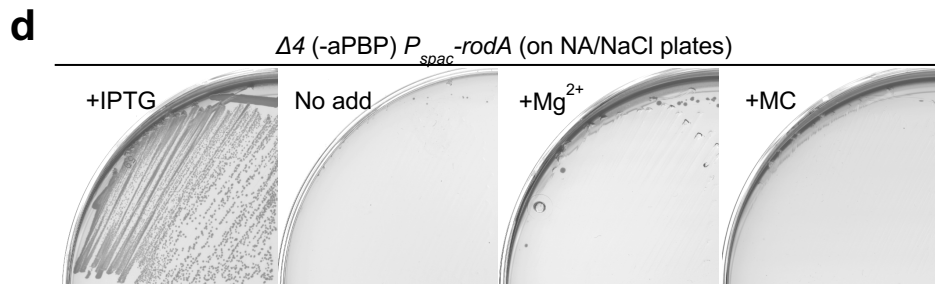

Supplementary Fig. 2. **Growth rescue of elongation mutants by MC.** **a** Suppression of a toxic effect in an *mbi* mutant by added  $Mg^{2+}$  or MC. *B. subtilis* wild-type strain (168CA) was cultured in NB, and phase contrast micrograph and the corresponding membrane staining image for the exponentially growing cells were captured. An *mbi* mutant strain was cultured in NB containing 10 mM  $Mg^{2+}$  (Time 0), and the cells were diluted into fresh NB (no added  $Mg^{2+}$ ) with or without 10  $\mu\text{g}/\text{ml}$  MC and incubated for 2-3 hr. Phase contrast micrographs and the corresponding membrane staining images were captured after the dilution. Scale bars represent 5  $\mu\text{m}$ . **b** Schematic representation of key factors for PG synthesis during cell wall elongation in *B. subtilis*. **c** Growth rescue by MC in a strain lacking *mreB*, *mreC* and *mreD* genes ( $\Delta mreBCD$ ). YK1875 ( $\Delta mreBCD$  *amyE::P<sub>xyI</sub>-mreBCD*) was streaked on NA plates containing 100 mM NaCl (for osmoprotection), with or without 0.5 xylose, 10 mM  $Mg^{2+}$  or 40  $\mu\text{g}/\text{ml}$  MC, and incubated for 24 hr at 37°C. **d** aPBP-dependent growth rescue by MC in a *rodA* mutant. YK2242 ( $\Delta 4$  *P<sub>spac</sub>-rodA*) was streaked on NA plates containing 100 mM NaCl (for osmoprotection), with or without 0.1 mM IPTG, 10 mM  $Mg^{2+}$  or 40  $\mu\text{g}/\text{ml}$  MC, and incubated for 24 hr at 37°C.

The figures are representative of three independent experiments.

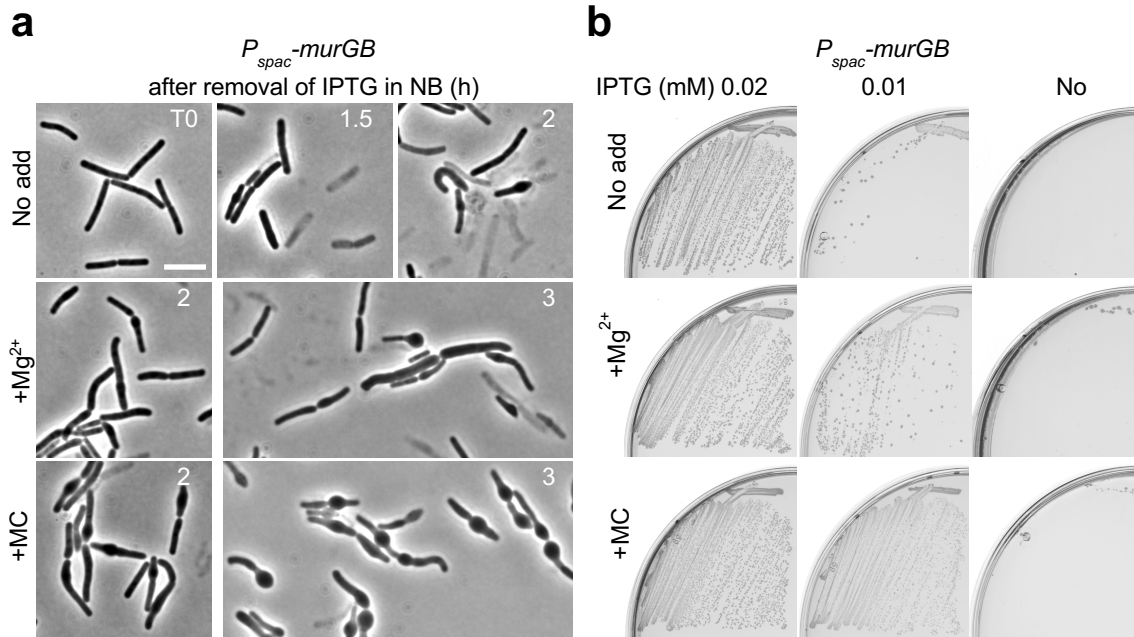

Supplementary Fig. 3. **Growth rescue by MC during PG precursor depletion.** **a** Effects of MC and Mg<sup>2+</sup> on cell morphology and lysis during *murGB* repression. Phase contrast micrographs of *B. subtilis* cells in the course of carrying out the growth curves shown in Figure 3A. *B. subtilis* strain YK1540 (*P<sub>spac</sub>-murG-murB*) was cultured in NB containing 0.1 mM IPTG at 37°C (T0, hr). The exponentially growing cells were diluted into fresh NB (without IPTG) with 10 µg/ml MC or 10 mM Mg<sup>2+</sup> and incubated for 1.5-3 hr. Scale bars represent 5 µm. **b** Growth rescue by MC during *murGB* repression. The YK1540 was streaked on NA plates containing IPTG, with or without 10 mM Mg<sup>2+</sup> or 10 µg/ml MC, as indicated.

The figures are representative of at least three independent experiments.

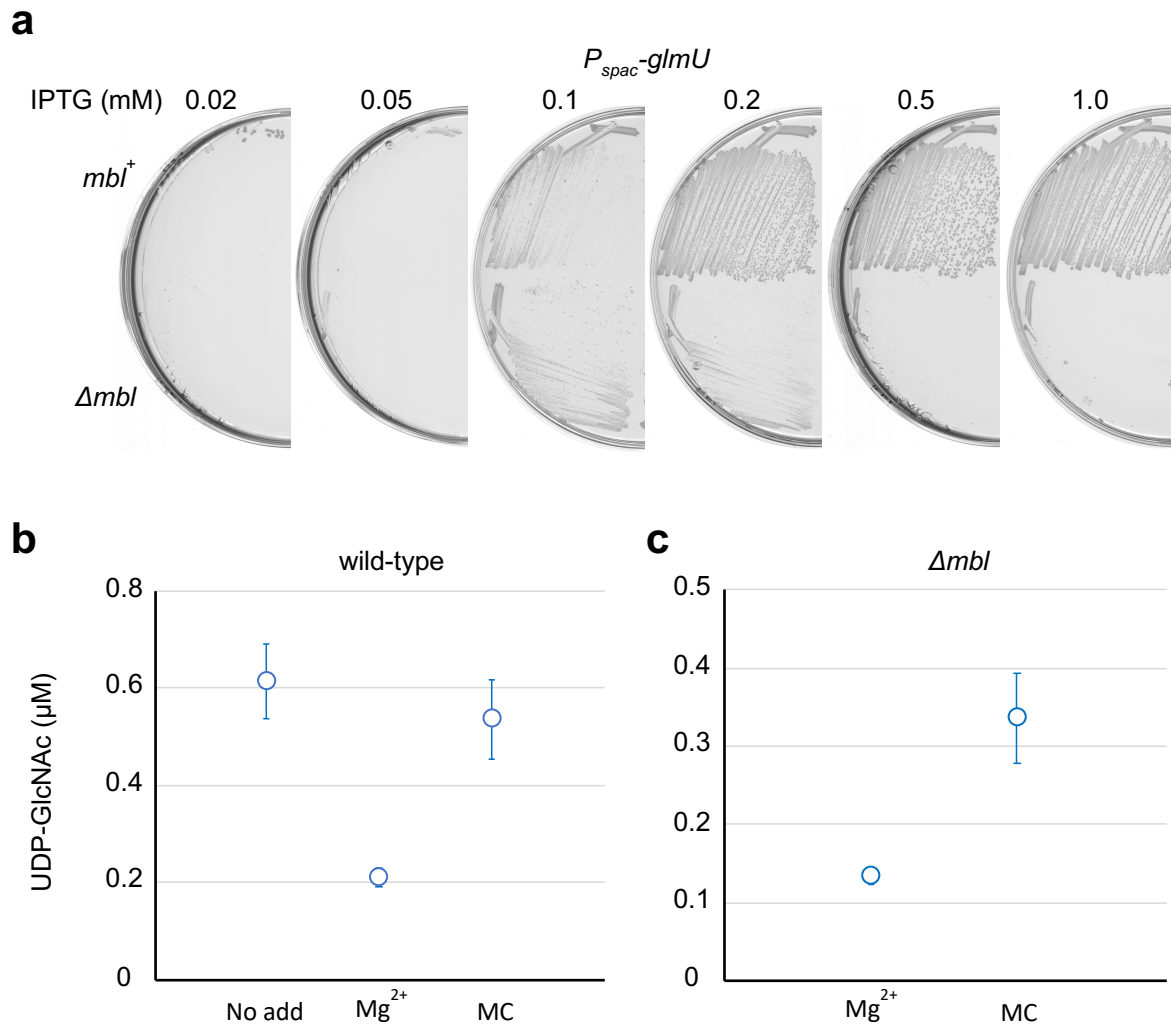

Supplementary Fig. 4. **Growth rescue of *mbl* mutant by Mg<sup>2+</sup> associates with UDP-GlcNAc synthesis.** **a** Growth rescue of an *mbl* mutant by reducing UDP-GlcNAc synthesis. *B. subtilis* strains YK1538 (*P<sub>spac</sub>-glmU*) and YK2687 ( $\Delta mbl$  *P<sub>spac</sub>-glmU*) were streaked on NA plates containing various concentrations of IPTG, as indicated, and incubated for 18 hr at 37°C. The figures are representative of three independent experiments. **b** Effect of Mg<sup>2+</sup> on intracellular UDP-GlcNAc concentrations. Wild-type strain (168CA) was cultured in LB with or without 10 mM Mg<sup>2+</sup> or 10 μg/ml MC at 37°C to an OD<sub>600</sub>=0.5. Cells were harvested from 7 ml of culture by centrifugation, washed and used for obtaining samples for measurements of UDP-GlcNAc levels. The means were obtained from three independent experiments. Error bars indicate standard deviation (SD). Source data are provided as a Source Data file. **c** Mg<sup>2+</sup>-dependent reduction of UDP-GlcNAc levels in an *mbl* mutant. YK2638 ( $\Delta mbl$ ) was cultured in LB containing 10 mM Mg<sup>2+</sup> and diluted into fresh LB with 10 mM Mg<sup>2+</sup> or 10 μg/ml MC. The cells were incubated at 37°C to OD<sub>600</sub>=0.5 for measurements of UDP-GlcNAc levels. The means were obtained from three independent experiments. Error bars indicate SD. Source data are provided as a Source Data file.

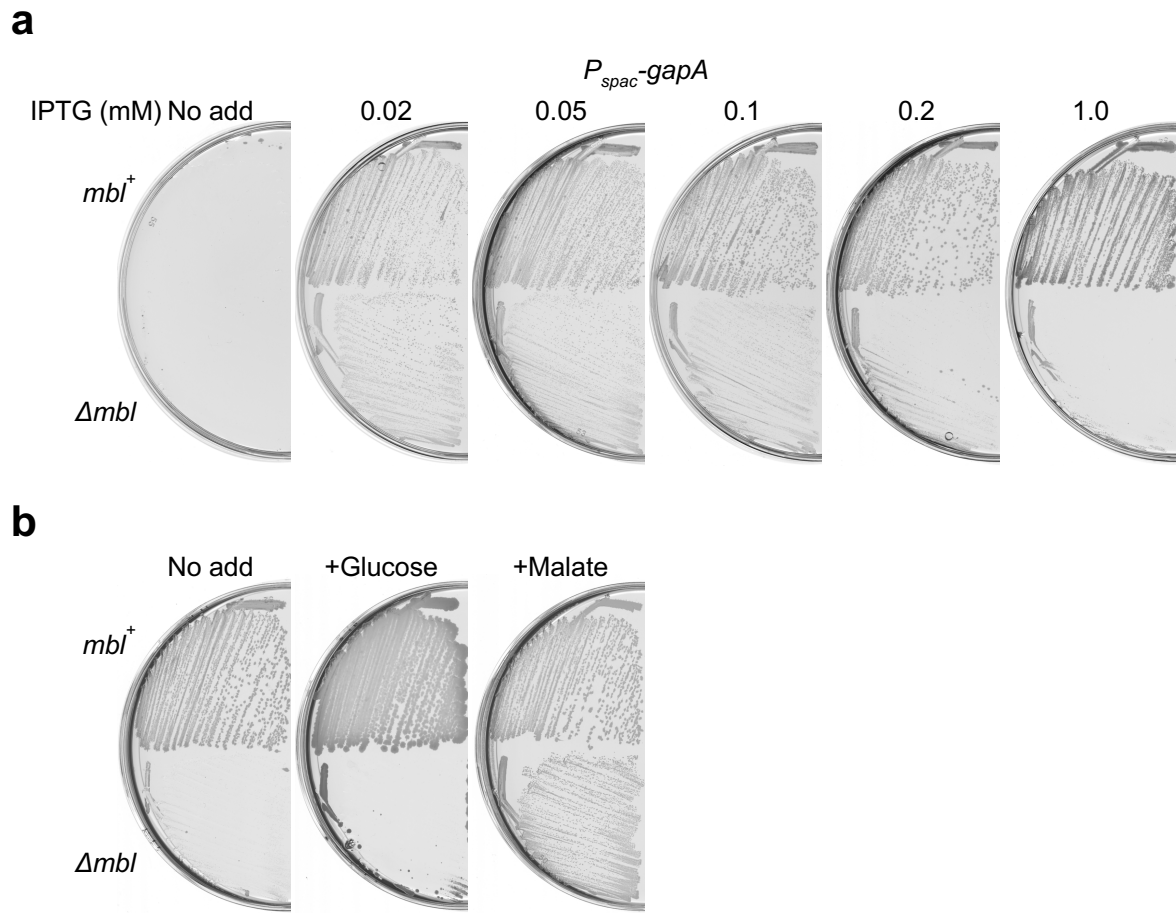

Supplementary Fig. 5. ***mbi* mutant lethality associates with glycolysis.** **a** Effects of *gapA* expression levels on *mbi* mutant growth. *B. subtilis* strains YK1567 ( $P_{spac}\text{-}gapA$ ) and YK2711 ( $\Delta mbl P_{spac}\text{-}gapA$ ) were streaked on NA plates containing various concentrations of IPTG, as indicated, and incubated for 18 hr at 37°C. **b** Effects of glycolytic or gluconeogenic carbon source on growth of an *mbi* mutant. Wild-type (168CA) and  $\Delta mbl$  (YK2638) strains were streaked on NA with or without 0.2% glucose or malate and incubated for 18 hr at 37°C.

The figures are representative of at least three independent experiments.

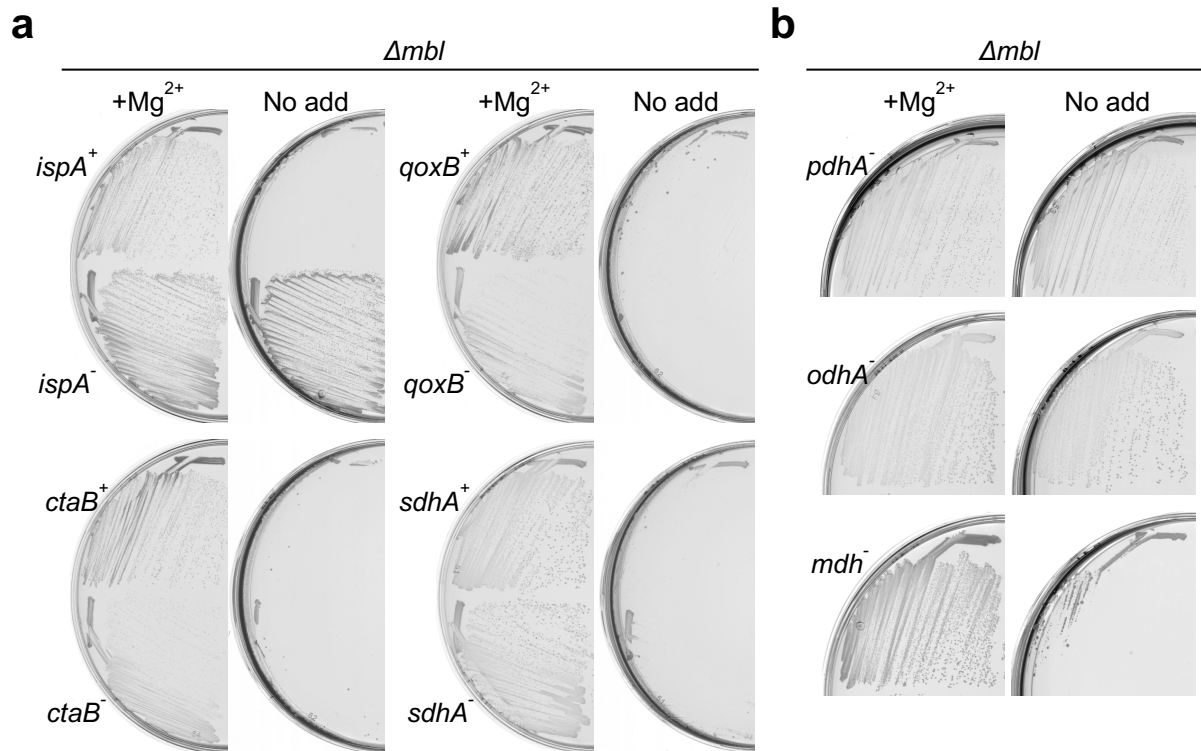

Supplementary Fig. 6. **Effects of respiratory chain enzymes and NADH production on *mbl* mutant lethality.** **a** *B. subtilis* strains YK2638 ( $\Delta mbl$ ), YK2694 ( $ispA^- \Delta mbl$ ), YK2696 ( $\Delta qoxB \Delta mbl$ ), YK2697 ( $\Delta ctaB \Delta mbl$ ) and YK2718 ( $\Delta sdhA \Delta mbl$ ) were streaked on NA plates with or without 10 mM  $Mg^{2+}$  and incubated for 18 hr at 37°C. **b** YK2732 ( $P_{spac^-}pdhA \Delta mbl$ ), YK2716 ( $\Delta odhA \Delta mbl$ ) and YK2720 ( $\Delta mdh \Delta mbl$ ) were streaked on NA plates with or without 10 mM  $Mg^{2+}$  and incubated for 18 hr at 37°C.

The figures are representative of at least three independent experiments.



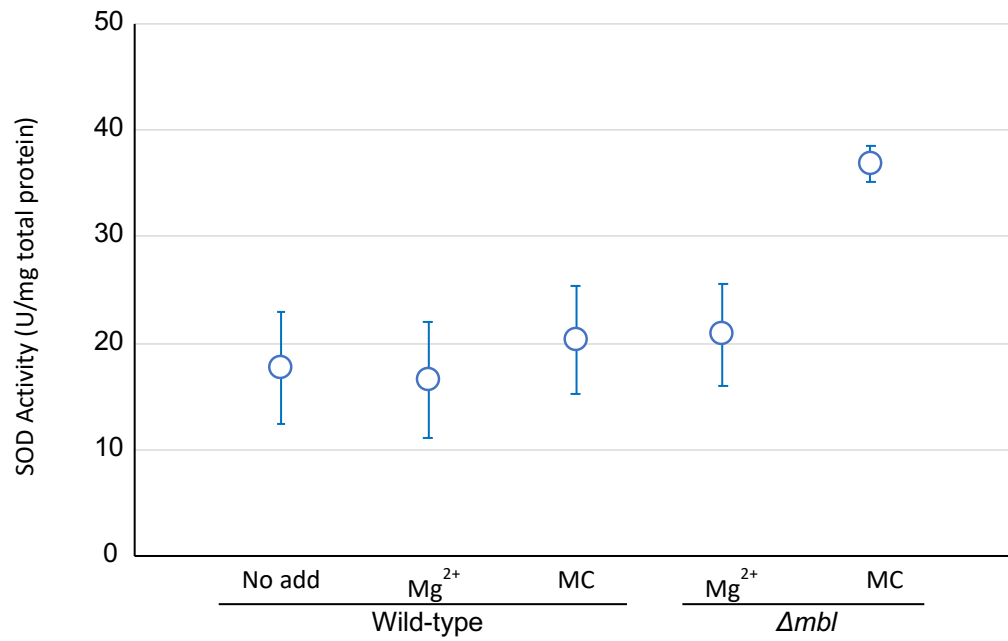

Supplementary Fig. 7. **Enhancement of SOD activity in an *mbI* mutant and its suppression by  $Mg^{2+}$ .** *B. subtilis* strains 168CA (wild-type) and YK2638 ( $\Delta mbl$ ) were cultured with or without 20 mM  $Mg^{2+}$  or 10  $\mu g/ml$  MC at 37°C to  $OD_{600}=0.6$ . SOD activity was measured in lysates of the cells. The means were obtained from three independent experiments. Error bars indicate SD. Source data are provided as a Source Data file.

Supplementary Table 1. Bacterial strains

| Strains            | Genotypes                                                                                                                                                                                                                                                                                                                        | References |
|--------------------|----------------------------------------------------------------------------------------------------------------------------------------------------------------------------------------------------------------------------------------------------------------------------------------------------------------------------------|------------|
| <i>B. subtilis</i> |                                                                                                                                                                                                                                                                                                                                  |            |
| Marburg (NCIB3610) | wild-type                                                                                                                                                                                                                                                                                                                        | Lab. stock |
| 168CA              | <i>trpC2</i> (wild-type)                                                                                                                                                                                                                                                                                                         | Lab. stock |
| BS115              | <i>trpC2</i> $\Omega$ <i>spoVD::cat-P<sub>xyI</sub>-murE</i>                                                                                                                                                                                                                                                                     | 1          |
| LR2                | <i>trpC2</i> $\Omega$ <i>spoVD::cat-P<sub>xyI</sub>-murE ispA</i> <sup>-</sup>                                                                                                                                                                                                                                                   | 2          |
| YK1395             | <i>trpC2 ispA</i> <sup>-</sup> ( <i>xseB::Tn-kan</i> )                                                                                                                                                                                                                                                                           | 2          |
| YK1450             | <i>trpC2</i> $\Omega$ <i>hepS::erm-P<sub>spac</sub>-hepS</i>                                                                                                                                                                                                                                                                     | 3          |
| YK1538             | <i>trpC2</i> $\Omega$ <i>glmU::erm-P<sub>spac</sub>-glmU</i>                                                                                                                                                                                                                                                                     | This work  |
| YK1540             | <i>trpC2</i> $\Omega$ <i>murG::erm-P<sub>spac</sub>-murG-murB</i>                                                                                                                                                                                                                                                                | This work  |
| YK1567             | <i>trpC2</i> $\Omega$ <i>gapA::erm-P<sub>spac</sub>-gapA</i>                                                                                                                                                                                                                                                                     | 4          |
| YK1714             | <i>trpC2 ndh::Tn-kan</i>                                                                                                                                                                                                                                                                                                         | 3          |
| YK1875             | <i>trpC2</i> $\Delta$ <i>neo-<math>\Delta</math>mreB-mreC-mreD amyE::P<sub>xyI</sub>-mreB-mreC-mreD spc</i>                                                                                                                                                                                                                      | 5          |
| YK2242             | <i>trpC2</i> $\Delta$ 4 <i>P<sub>spac</sub>-rodA kan</i>                                                                                                                                                                                                                                                                         | 6          |
| YK2245             | <i>trpC2</i> <i>P<sub>spac</sub>-rodA kan</i>                                                                                                                                                                                                                                                                                    | 6          |
| YK2265             | <i>trpC2 aprE::P<sub>rpsD</sub>-mcherry spc</i>                                                                                                                                                                                                                                                                                  | 3          |
| YK2625             | <i>trpC2</i> $\Delta$ <i>mbI::cat</i> $\Omega$ <i>hepS::erm-P<sub>spac</sub>-hepS</i>                                                                                                                                                                                                                                            | 3          |
| YK2638             | <i>trpC2</i> $\Delta$ <i>mbI::cat</i>                                                                                                                                                                                                                                                                                            | 7          |
| YK2646             | <i>trpC2</i> $\Delta$ <i>mbI::cat ndh::Tn-kan</i>                                                                                                                                                                                                                                                                                | 3          |
| YK2665             | <i>trpC2</i> $\Delta$ <i>mbI::cat</i> $\Omega$ <i>murG::erm-P<sub>spac</sub>-murG-murB</i>                                                                                                                                                                                                                                       | This work  |
| YK2687             | <i>trpC2</i> $\Delta$ <i>mbI::cat</i> $\Omega$ <i>glmU::erm-P<sub>spac</sub>-glmU</i>                                                                                                                                                                                                                                            | This work  |
| YK2689             | <i>trpC2</i> $\Omega$ <i>murG::erm-P<sub>spac</sub>-murG-murB ndh::Tn-kan</i>                                                                                                                                                                                                                                                    | This work  |
| YK2694             | <i>trpC2</i> $\Delta$ <i>mbI::cat ispA</i> <sup>-</sup> ( <i>xseB::Tn-kan</i> )                                                                                                                                                                                                                                                  | 2          |
| YK2696             | <i>trpC2</i> $\Delta$ <i>mbI::cat qoxB::Tn-kan</i>                                                                                                                                                                                                                                                                               | 3          |
| YK2697             | <i>trpC2</i> $\Delta$ <i>mbI::cat ctaB::Tn-kan</i>                                                                                                                                                                                                                                                                               | 3          |
| YK2700             | <i>trpC2</i> $\Delta$ <i>mbI::cat amyE::P<sub>xyI</sub>-murB-spc</i>                                                                                                                                                                                                                                                             | This work  |
| YK2701             | <i>trpC2</i> $\Delta$ <i>mbI::cat amyE::P<sub>xyI</sub>-murG-spc</i>                                                                                                                                                                                                                                                             | This work  |
| YK2711             | <i>trpC2</i> $\Delta$ <i>mbI::cat</i> $\Omega$ <i>gapA::erm-P<sub>spac</sub>-gapA</i>                                                                                                                                                                                                                                            | This work  |
| YK2716             | <i>trpC2</i> $\Delta$ <i>mbI::cat</i> $\Omega$ <i>odhA::erm</i> $\Delta$ <i>odhA</i>                                                                                                                                                                                                                                             | This work  |
| YK2718             | <i>trpC2</i> $\Delta$ <i>mbI::cat</i> $\Omega$ <i>sdhA::erm</i> $\Delta$ <i>sdhA</i>                                                                                                                                                                                                                                             | This work  |
| YK2720             | <i>trpC2</i> $\Delta$ <i>mbI::cat</i> $\Omega$ <i>mdh::erm</i> $\Delta$ <i>mdh</i>                                                                                                                                                                                                                                               | This work  |
| YK2732             | <i>trpC2</i> $\Delta$ <i>mbI::cat</i> $\Omega$ <i>pdhA::erm-P<sub>spac</sub>-pdhA</i>                                                                                                                                                                                                                                            | This work  |
| YK2739             | <i>trpC2</i> $\Delta$ <i>efeU::kan</i>                                                                                                                                                                                                                                                                                           | 8          |
| YK2740             | <i>trpC2</i> $\Delta$ <i>fecC::kan</i>                                                                                                                                                                                                                                                                                           | 8          |
| YK2741             | <i>trpC2</i> $\Delta$ <i>feuA::kan</i>                                                                                                                                                                                                                                                                                           | 8          |
| YK2771             | <i>trpC2</i> $\Delta$ <i>mbI::cat</i> $\Delta$ <i>fecC::kan</i>                                                                                                                                                                                                                                                                  | 8          |
| <i>E. coli</i>     |                                                                                                                                                                                                                                                                                                                                  |            |
| BW25113            | <i>lacI</i> <sup>+</sup> <i>rrnB</i> <sub>T14</sub> $\Delta$ <i>lacZ</i> <sub>WJ16</sub> <i>hsdR514</i> $\Delta$ <i>araBAD</i> <sub>AH33</sub> $\Delta$ <i>rhaBAD</i> <sub>LD78</sub> <i>rph-1</i> $\Delta$ ( <i>araB-D</i> )567 $\Delta$ ( <i>rhaD-B</i> )568 $\Delta$ <i>lacZ</i> 4787( <i>::rrnB-3</i> ) <i>hsdR514 rph-1</i> | Lab. stock |

Supplementary Table 2. Primers

| Primers      | Sequences                                  |
|--------------|--------------------------------------------|
| pMSD-glmU-F  | GGGGAATTCTTCTATGGATAAAAGGGATATTG           |
| pM-glmU-R    | GGGGGATCCAAGCGGCGTATCTCCGCAA               |
| pMSD-murGB-F | GGGGAATTCTTATCGTTATGTTATAGAGAAACT          |
| pM-murGB-R   | GGGGGATCCCCGCCCCACATACATAACC               |
| pMSD-pdhA-F  | GAAGAATTCAATGCACGTCTAATGACTG               |
| pM-pdhA-R    | GGAGGATCCCCGGAATGCGTTGCAATC                |
| pM-sdhA-F    | GAAGAATTCTAAAGCAGCGGAATCAGG                |
| pM-sdhA-R    | GGAGGATCCTTA TCGTCGCACCAGCATAAG            |
| pM-mdh-F     | GAAGAATTCGAGCTGGCAGACGTTGTTC               |
| pM-mdh-R     | GGAGGATCC TTACCTGACTGGCCGATTACAC           |
| MK116        | GAGGAAGCGGAAGAATGAAG                       |
| MK117        | TTCGGTAAGTCCCGTCTAGC                       |
| MK532        | CCCAGTCTAAGATGCATTTTATGTCATATTG            |
| MK533        | GACATAAAATGCATCTTAGACTGGGGGAAAAAAGAAATGC   |
| MK534        | GCTCTAGAACTAGAATTCTATTTTTTAATTCCTCGAGTACG  |
| MK535        | CGTACTCGAGGAATTAATAAATAGGAATTCTAGTTCTAGAGC |
| MK536        | CTCCGCATTCCATAGATGCATTTTATGTCATATTG        |
| MK537        | GACATAAAATGCATCTATGGAATGCGGAGGTTTAC        |
| MK538        | CTCTAGAACTAGAATTCTCAGCGATTTCCGCCGATG       |
| MK539        | CATCGGCGGAATCGCTGAGAATTCTAGTTCTAGAGC       |

## SUPPLEMENTARY REFERENCES

- 1 Leaver, M. Dominguez-Cuevas, P. Coxhead, J. M. Daniel, R. A. & Errington, J. Life without a wall or division machine in *Bacillus subtilis*. *Nature* **457**, 849-853 (2009). doi.org:10.1038/nature07742
- 2 Mercier, R. Kawai, Y. & Errington, J. Excess membrane synthesis drives a primitive mode of cell proliferation. *Cell* **152**, 997-1007 (2013). doi.org:10.1016/j.cell.2013.01.043
- 3 Kawai, Y. *et al.* Cell growth of wall-free L-form bacteria is limited by oxidative damage. *Curr Biol* **25**, 1613-1618 (2015). doi.org:10.1016/j.cub.2015.04.031
- 4 Kawai, Y. *et al.* Crucial role for central carbon metabolism in the bacterial L-form switch and killing by  $\beta$ -lactam antibiotics. *Nat Microbiol.* (2019). doi.org:10.1038/s41564-019-0497-3
- 5 Leaver, M. & Errington, J. Roles for MreC and MreD proteins in helical growth of the cylindrical cell wall in *Bacillus subtilis*. *Mol Microbiol.* **57**, 1196-1209 (2005). doi.org:10.1111/j.1365-2958.2005.04736.x
- 6 Emami, K. *et al.* RodA as the missing glycosyltransferase in *Bacillus subtilis* and antibiotic discovery for the peptidoglycan polymerase pathway. *Nat Microbiol* **2**, 16253 (2017). doi.org:10.1038/nmicrobiol.2016.253
- 7 Schirner, K. & Errington, J. The cell wall regulator  $\sigma^W$  specifically suppresses the lethal phenotype of *mbl* mutants in *Bacillus subtilis*. *J Bacteriol* **191**, 1404-1413 (2009). doi.org:10.1128/JB.01497-08
- 8 Koo, B. M. *et al.* Construction and Analysis of Two Genome-Scale Deletion Libraries for *Bacillus subtilis*. *Cell Syst* **4**, 291-305 e297 (2017). doi.org:10.1016/j.cels.2016.12.013
